# Supplementary material for: Introduction of a Digital Care Companion to Facilitate Patient Reported Outcome Measures and Breast Care Nurse-Led Survivorship
Source: Research Square preprint supplement (doi:10.21203/rs.3.rs-6407999/v1), 2025-06-04
Supplement: Supplementary file 1 [file 2d66e1b48357d19310fbc292.docx]

Appendix

Appendix 1. Supportive Care ScreeningTool questionnaire


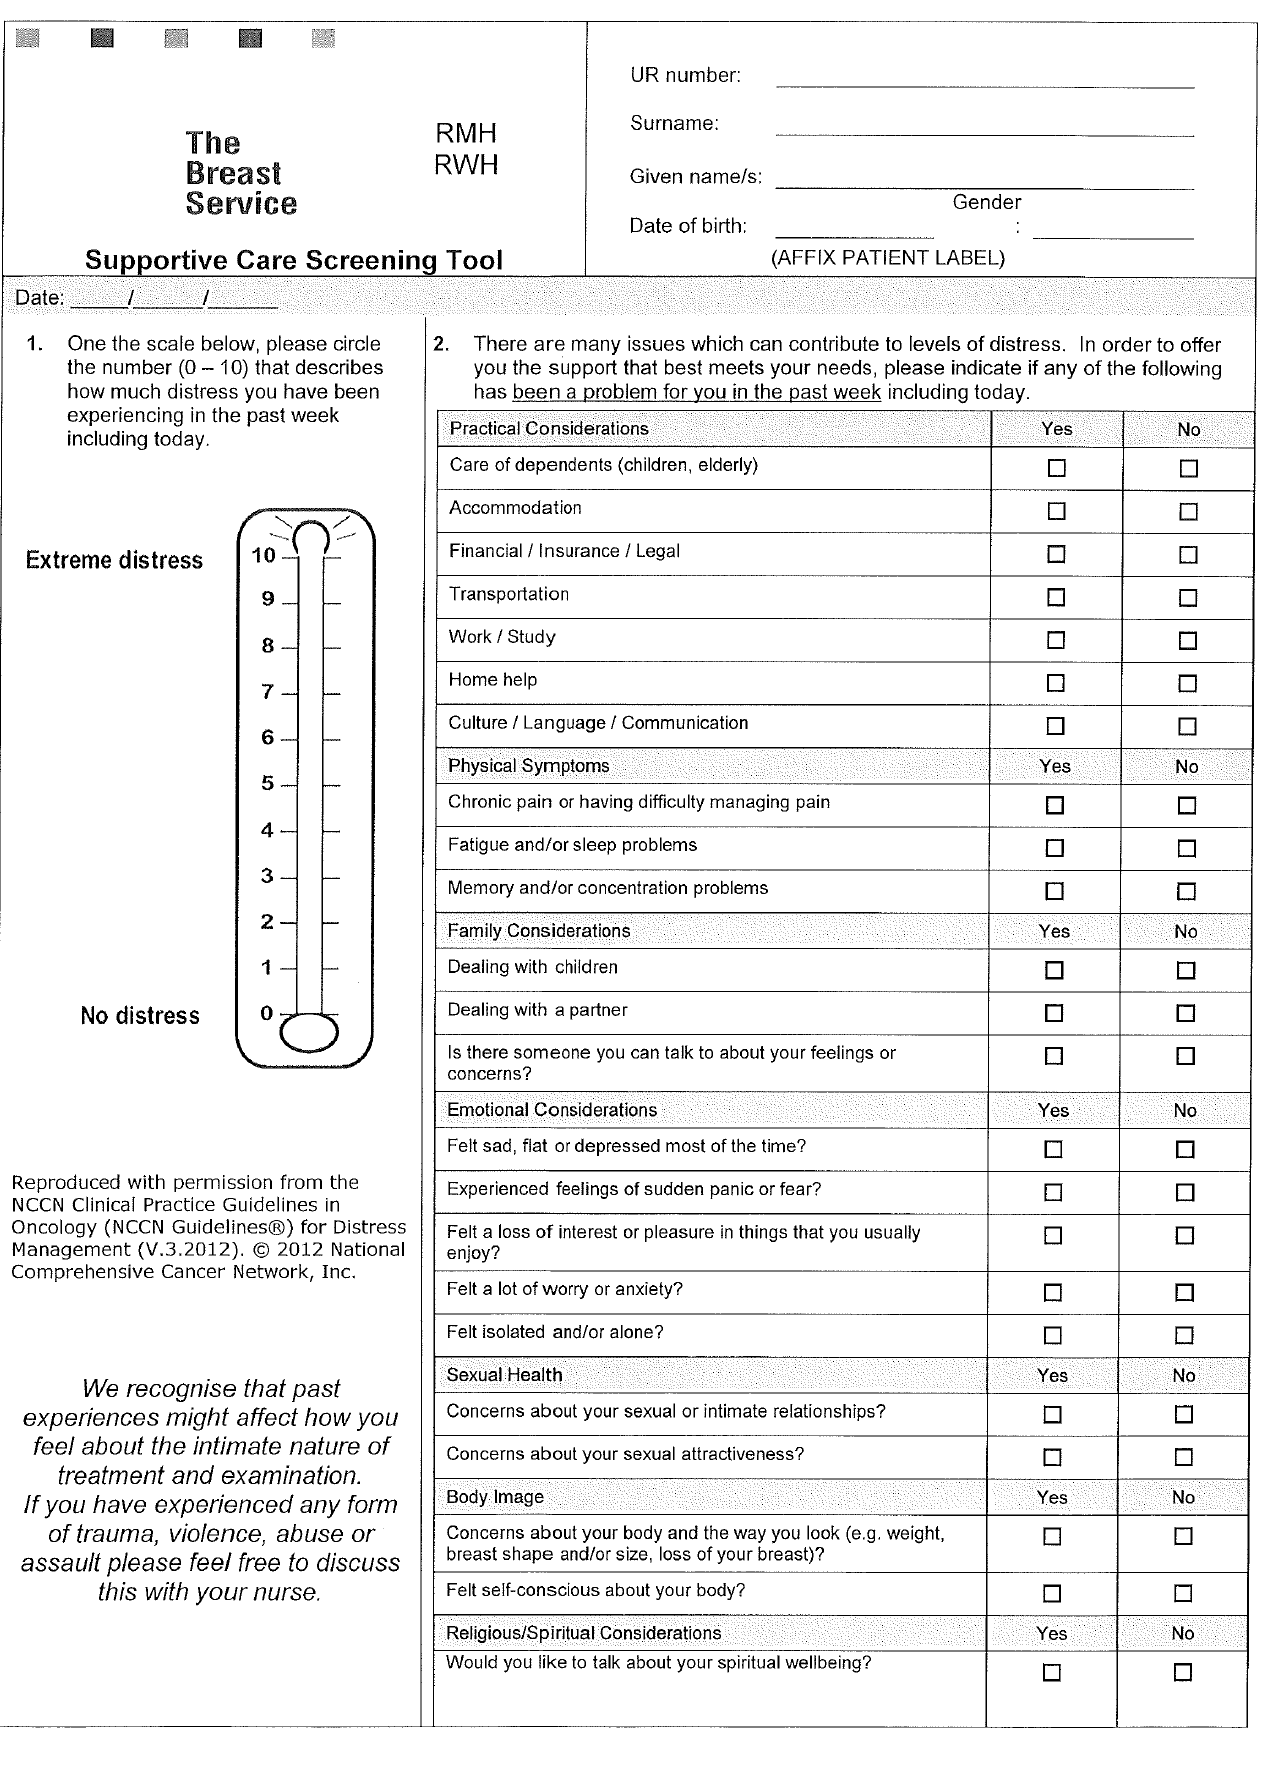


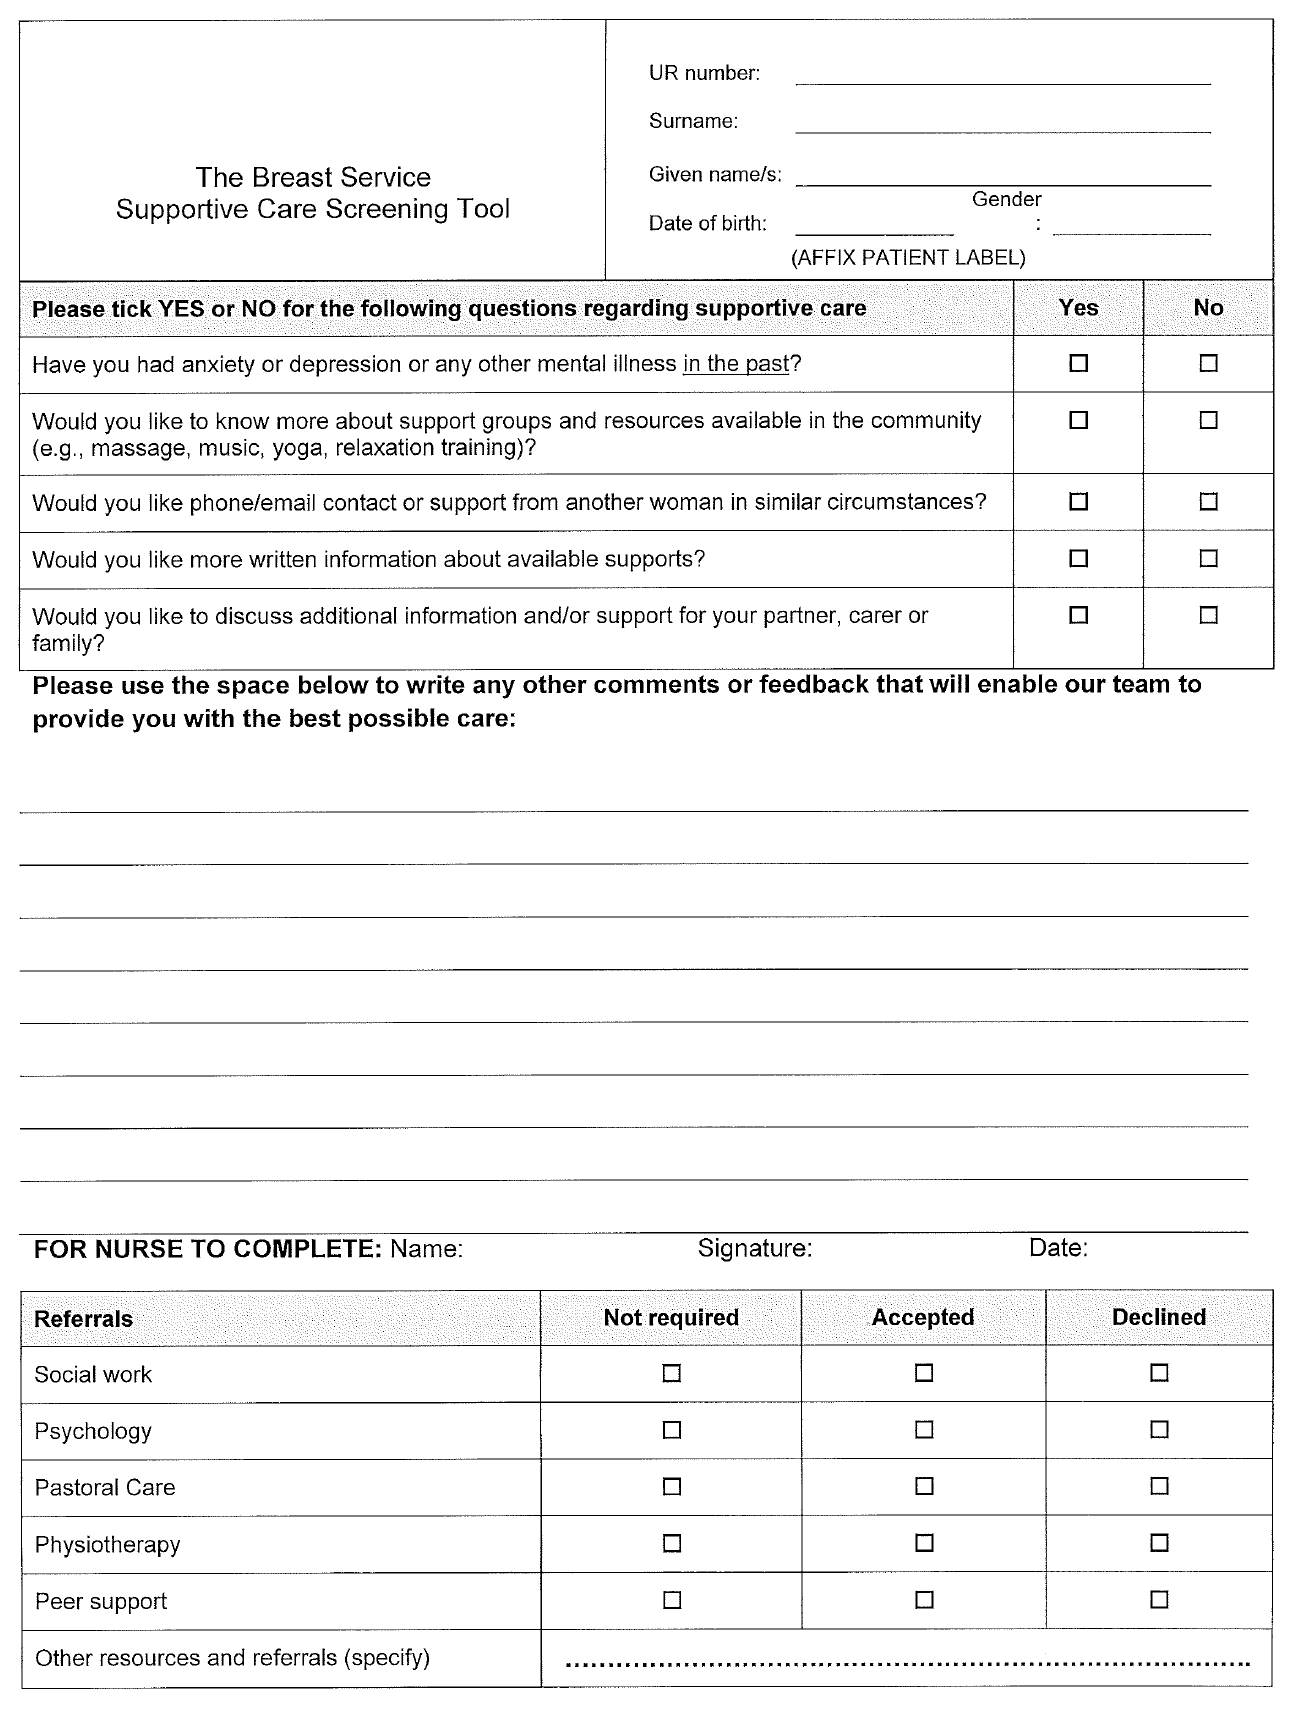


Appendix 2. Demographic characteristics of participants who have completed ePROMS and attended NLC

| Total number of participants | N=47 |
| --- | --- |
| Mean age of participants | 59 years old (S.d 9.3) |
| Interpreter | Yes:3(6.4%), No:44 (  93.6%) |
| Primary language | English: 42(89.4%)  Arabic: 2 (4.3%)  Vietnam: 2(4.3%)  Auslan: 1(2.1) |
| Country of birth | Australia: 27 (57.4%)  England: 5 (10.6%)  Lebanon: 3 (6.4%)  Turkey: 2 (4.3%)  Vietnam: 2 (4.3%)  Egypt: 2(4.3%)  Angola: 1 (2.1%)  Argeti:1(2.1%)  Germany: 1 (2.1%)  India:1(2.1%)  Indonesia: 1(2.1%)  New Zealand: 1 (2.1%) |

November 26, 2024

To Whom It May Concern:

I am writing in response to the request to include the screenshot copied herein—which include Epic’s software—in an article entitled “Introduction of a digital care companion to facilitate PROMS and Breast Care Nurse-Led Survivorship” (Mao, et al.) to be published in *Discover Public Health.*

Epic Systems Corporation hereby grants ASCO Publications, as the publisher of *the Patient-Patient-Centered Outcomes Research*, limited permission to publish in all formats (*i.e.*, print and digital) such screenshot as part of the journal referenced herein, provided that the screenshot is not subject to any Creative Commons or similar license and copyright attribution is provided to Epic Systems Corporation in conjunction with the screenshot.


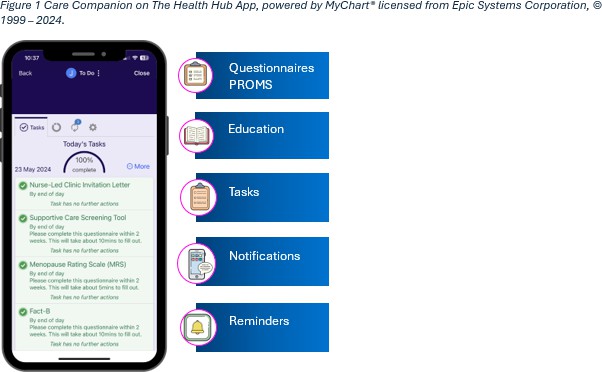


Thank you for your part in protecting Epic’s intellectual property. Please feel free to contact me at

[trademarks@epic.com](mailto:trademarks@epic.com) if you have any questions. Sincerely,

***Patrick C. Harrigan***

Patrick Harrigan Attorney

Epic Systems Corporation

1979 Milky Way | Verona, WI 53593 | 608.271.9000 | FAX: 608.271.7237 | [www.epic.com](http://www.epic.com/)
